# Supplementary material
Source: PubMed Central journal article supplement (PMC4732568)

# Supplemental Figure 1

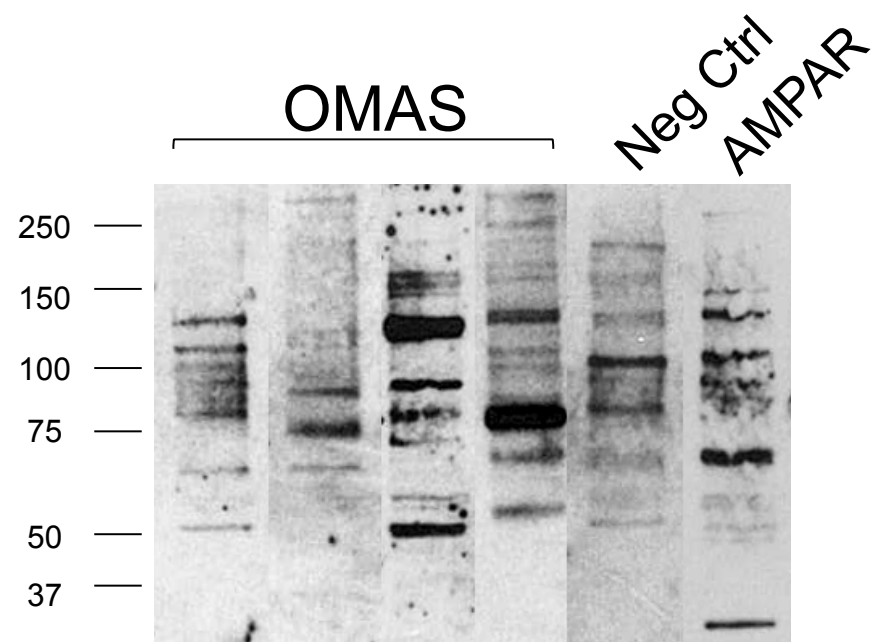

Supplement: NIHMS714169-supplement.pdf [file NIHMS714169-supplement.pdf]
